# Supplementary material for: Mapping of the supplementary motor area using repetitive navigated transcranial magnetic stimulation
Source: Front Neurosci. 2023 Oct 4;17:1255209. doi: 10.3389/fnins.2023.1255209 (PMC10582562; doi:10.3389/fnins.2023.1255209)
Supplement: Supplementary file 5 [file Data_Sheet_1.XLSX]

## Sheet: Tabelle1
Number	Age	Gender	Handedness	fingertaps baseline rh	total stimulationpoints rh	unique stimulationpoints rh	fingertaps baseline lh	total stimulationpoints lh	unique stimulationpoints lh	stimulation points with no error rh	replicable stimulation points with no error rh	stimulation points with minor error rh	replicable stimulation points with minor error rh	limited replicable stimulation points with minor error rh	stimulation points with major error rh	replicable stimulation points with major error rh	limited replicable stimulation points with major error rh	stimulation points M1 affected rh	fingertaps stimulation hotspot rh	9hpt baseline rh (sec)	9hpt hotspot stimulation rh (sec)	bimanual finger tapping hotspot rh	stimulation points with no error lh	replicable stimulation points with no error lh	stimulation points with minor error lh	replicable stimulation points with minor error lh	limited replicable stimulation points with minor error lh	stimulation points with major error lh	replicable stimulation points with major error lh	limited replicable stimulation points with major error lh	stimulation points M1 affected lh	fingertaps stimulation hotspot lh	9hpt baseline lh (sec)	9hpt hotspot stimulation lh (sec)	bimanual finger tapping hotspot stimulation lh	unique stimulation points foot rh	total stimulation points foot rh	stimulation points with visual error rh	replicable stimulation points with visual error rh	stimulation points without visual error rh	replicable stimulation points without visual error rh	stimulation points M1 affected foot rh	unique stimulation points foot lh	total stimulation points foot lh	stimulation points with visual error lh	replicable stimulation points with visual error lh	stimulation points without visual error lh	replicable stimulation points without visual error lh	stimulation points M1 affected foot lh
1	28	1	1	33	42	20	28	42	20	34	15	8	2	0	0	0	0	0	23.5	12.4	15.6	30	21	6	12	1	2	5	2	1	4	22.5	11.6	16.7	31	10	20	0	0	20	10	0	10	20	6	2	14	6	0
2	21	1	1	26	42	19	27	45	21	40	18	2	1	0	1	0	1	0	23.0	11.6	11.4	26.5	43	20	2	1	0	0	0	0	0	24.0	10.3	11.4	26	10	20	6	1	9	2	5	10	20	6	2	12	5	2
3	61	2	1	29	26	20	35	39	18	43	19	3	1	0	0	0	0	0	26.5	18.1	18.3	29.5	22	9	11	4	2	2	0	2	4	27.5	16.2	17.8	29	10	20	4	1	16	7	0	10	20	7	2	12	4	1
4	22	2	1	28	38	17	32	43	19	20	7	18	6	0	0	0	0	0	23.5	14.0	15.4	29.5	18	6	9	2	1	13	4	0	3	18.5	13.8	15.7	28	9	18	7	3	3	1	8	9	18	12	6	2	1	4
5	27	1	1	30	39	18	30	45	20	30	13	5	1	0	2	0	0	2	26.5	11.4	14.6	29	41	19	1	0	0	1	0	0	2	27.0	13.1	12.2	31	9	18	3	1	15	7	0	9	18	0	0	18	9	0
6	27	1	1	29	43	19	32	43	21	41	19	1	0	0	1	0	0	0	26	12.4	13.2	29	43	21	0	0	0	0	0	0	0	30.0	10.4	10.5	32	10	20	3	0	17	7	0	10	20	0	0	20	10	0
7	22	1	2	31	44	21	29	45	21	40	19	4	1	0	0	0	0	0	27	14.8	20.0	28.5	45	21	0	0	0	0	0	0	0	28.0	14.8	18.6	30	10	20	5	1	15	6	0	10	20	3	1	14	5	3
8	28	1	3	32	44	20	31	40	19	37	18	5	1	0	0	0	0	0	27	11.1	14.3	30.5	39	18	1	0	0	0	0	0	0	28.5	12.3	14.5	30	9	18	0	0	7	2	11	9	17	7	2	9	3	1
9	31	1	1	27	43	19	28	41	19	42	19	1	0	0	0	0	0	0	24.5	14.1	16.2	25	40	19	1	0	0	0	0	0	0	26.0	12.2	13.1	28	9	18	5	2	13	6	0	10	20	0	0	20	10	0
10	22	2	1	30	46	21	31	44	21	46	21	0	0	0	0	0	0	0	29.5	16.4	16.7	30	41	20	1	0	0	0	0	0	2	28.5	14.4	16.8	31	10	20	7	2	13	5	0	10	20	6	2	14	6	0
11	54	1	1	25	41	19	25	43	20	37	18	4	1	0	0	0	0	0	19.5	13.6	20.0	22	39	19	3	0	0	0	0	0	1	22.0	11.8	12.4	24.5	10	20	1	0	19	9	0	10	20	3	1	17	8	0
12	67	2	1	32	43	20	29	35	17	42	20	1	0	0	0	0	0	0	30.5	14.4	16.9	31	20	7	7	1	1	6	2	0	2	11.5	15.2	18.7	20	9	18	6	1	12	4	0	6	12	9	4	3	1	0
13	24	1	2	30	43	20	29	42	20	36	18	6	1	1	1	0	1	0	26	13.2	17.0	26.5	40	19	1	0	1	1	0	1	0	27.0	12.4	20.0	26	9	18	8	3	10	4	0	10	20	8	4	12	6	0
14	22	2	1	30	44	20	31	43	20	35	16	8	1	1	1	0	1	0	25.5	12.8	20.0	30.5	33	16	7	2	1	3	1	1	0	25.0	11.0	20.0	27.5	10	20	4	1	13	5	3	10	20	4	2	16	8	0
15	27	1	1	27	45	20	28	45	19	36	17	6	1	1	3	1	1	0	22	12.6	20.0	25	36	17	5	0	1	4	0	2	0	25.0	12.1	13.2	26	10	20	9	3	10	3	1	10	20	12	6	8	4	0
16	44	1	1	32	42	19	31	40	18	36	16	4	2	0	2	1	0	0	25	11.0	12.3	31	30	14	3	0	1	3	1	1	4	23.0	11.2	17.9	25.5	10	20	0	0	20	10	0	10	20	6	3	14	7	0
17	55	1	1	27	36	16	31	36	16	33	15	3	1	0	0	0	0	0	25.5	16.9	16.3	29.5	28	14	2	0	0	6	2	0	0	18.0	13.8	19.5	22.5	8	16	4	1	12	5	0	8	16	4	1	12	5	0
18	54	2	1	30	41	19	36	41	19	41	19	0	0	0	0	0	0	0	29.5	17.3	14.8	32.5	41	19	0	0	0	0	0	0	0	34.0	13.7	15.2	36	10	20	0	0	20	10	0	9	18	1	0	17	8	0
19	41	1	1	28	41	18	29	38	18	34	15	6	2	1	1	0	1	0	24.5	12.1	20.0	27	28	14	0	0	0	8	3	0	2	22.0	11.7	20.0	26.5	6	12	4	1	8	3	0	9	18	3	1	15	7	0
20	53	1	2	27	40	18	27	44	20	40	18	0	0	0	0	0	0	0	26	13.4	14.0	27	39	17	1	0	0	0	0	0	4	25.5	13.2	13.9	27.5	10	20	11	3	9	2	0	10	20	7	2	13	5	0
21	22	1	1	32	41	19	33	36	17	39	19	2	0	0	0	0	0	0	28	13.6	14.1	33	23	11	4	1	1	9	4	1	0	25.5	12.0	16.2	26	10	20	7	2	13	5	0	8	16	6	2	10	4	0
22	29	2	1	30	37	17	30	40	19	37	17	0	0	0	0	0	0	0	29.5	18.3	17.3	29.5	40	19	0	0	0	0	0	0	0	29.0	16.8	15.5	29	9	18	7	1	11	3	0	9	18	11	4	7	2	0
23	22	2	1	26	45	21	33	40	19	38	18	5	2	0	0	0	0	2	23.5	17.8	19.1	25.5	27	9	12	2	0	0	0	0	1	28.5	15.0	16.1	32.5	10	20	7	1	13	4	0	9	18	5	1	13	5	0
24	40	2	3	31	41	19	35	43	20	32	16	9	3	0	0	0	0	0	25.5	15.5	20.0	26	25	11	12	4	0	2	0	2	4	28.5	14.5	17.9	27.5	10	20	15	6	5	1	0	9	18	12	4	6	1	0
25	22	2	2	33	39	19	31	43	19	39	19	0	0	0	0	0	0	0	30	13.9	15.7	34	38	17	5	2	0	0	0	0	0	27.0	14.2	18.7	30	10	20	7	2	13	5	0	10	20	8	3	12	5	0
26	63	2	1	28	38	18	34	38	18	36	18	2	0	0	0	0	0	0	25.5	18.3	20.0	28	27	12	9	2	0	0	0	0	2	29.0	15.0	19.4	28	9	18	3	1	15	7	0	9	18	3	0	15	6	0
27	61	2	1	31	41	20	29	42	19	41	20	0	0	0	0	0	0	0	28	15.1	16.5	29	31	13	8	1	0	0	0	0	3	25.5	14.4	15.5	28	10	20	4	1	16	7	0	10	20	6	1	14	5	0
28	22	2	3	36	33	16	32	37	18	20	7	11	2	1	2	1	0	0	25.5	12.5	15.2	29	37	18	0	0	0	0	0	0	0	30.0	12.2	15.3	31.5	6	12	6	2	6	2	0	9	18	4	1	14	6	0
29	30	2	1	29	40	19	32	41	19	32	16	2	1	0	8	3	0	0	14	13.8	20.0	15.5	27	13	4	1	2	8	3	1	2	24.5	11.5	20.0	26.5	6	12	7	2	5	1	0	10	20	5	0	15	5	0
30	45	2	1	37	40	18	40	38	18	29	11	9	1	0	2	0	0	0	31.5	13.7	15.5	38	31	14	2	0	0	0	0	0	5	33.0	12.1	14.2	37	9	18	10	3	8	2	0	10	20	11	5	9	4	0
31	48	2	2	31	42	20	32	42	20	37	18	1	0	1	4	1	1	0	20.5	14.8	17.6	24	31	15	1	0	0	8	3	0	2	19.0	14.5	20.0	22.5	9	18	9	3	9	3	0	8	16	8	4	6	3	2
rh- right hemisphere
lh- left hemisphere
