# Supplementary material for: Mapping of the supplementary motor area using repetitive navigated transcranial magnetic stimulation
Source: Frontiers journal article supplement (doi:10.3389/fnins.2023.1255209), 2023-10-04
Supplement: Table_1.PDF [file Table_1.PDF]

| Category                     | Number of subjects<br>with errors<br>(% of total sample) | Number of<br>stimulation points<br>with errors<br>Median (IQR) | Error incidence in<br>%<br>Median (IQR) |
|------------------------------|----------------------------------------------------------|----------------------------------------------------------------|-----------------------------------------|
| Replicable major<br>errors   | 11 (37%)                                                 | 2 (1-3)                                                        | 10.88 (5.34-15.79)                      |
| Replicable minor<br>errors   | 23 (77%)                                                 | 1 (1-2)                                                        | 5.88 (5.13-10.53)                       |
| Limited replicable<br>errors | 13 (43%)                                                 | 1 (1-1)                                                        | 5.26 (5.00-5.72)                        |
